# Supplementary material for: Changes in Diffusion Kurtosis Imaging and Magnetic Resonance Spectroscopy in a Direct Cranial Blast Traumatic Brain Injury (dc-bTBI) Model
Source: PLoS One. 2015 Aug 24;10(8):e0136151. doi: 10.1371/journal.pone.0136151 (PMC4547765; doi:10.1371/journal.pone.0136151)
Supplement: S1 File — (XLS) [file pone.0136151.s001.xls]

## Sheet: Supporting_data_revision
ID	Time	Group	Region	Gln	Ins	NAA	Tau	Choline	MK	FA	MD
340	baseline	TBI	IC_avg	2.729	4.3535	6.699	3.101	1.1545	0.983055	0.43269	0.000845605
344	baseline	TBI	IC_avg	2.4605	4.1785	6.218	2.8095	1.209	1.174	0.50349	0.00085619
346	baseline	TBI	IC_avg	2.3215	4.44	6.377	2.695	1.113	1.07835	0.479115	0.00088376
349	baseline	TBI	IC_avg	1.713	2.716	4.341	1.3465	0.8885	1.1432	0.42604	0.000888925
368	baseline	TBI	IC_avg	2.643	5.0075	6.267	3.363	1.216	1.0242	0.374945	0.000954665
379	baseline	TBI	IC_avg	2.823	5.1835	6.81	3.2655	1.335	1.07565	0.43953	0.000931615
340	Day1	TBI	IC_avg	3.621	4.2745	6.406	4.248	1.1405	1.13255	0.482895	0.00086594
344	Day1	TBI	IC_avg	2.891	4.9785	6.7845	3.005	1.078	1.15635	0.504125	0.00086876
346	Day1	TBI	IC_avg	2.54	5.195	6.7405	2.481	1.13	1.16785	0.533895	0.00088025
349	Day1	TBI	IC_avg	2.084	2.9215	3.6795	1.7095	0.9285	1.041	0.441405	0.000883605
368	Day1	TBI	IC_avg	3.1895	4.3745	7.1765	1.773	1.3345	1.14715	0.44265	0.00089902
379	Day1	TBI	IC_avg	3.1265	5.2535	6.6635	3.4315	1.144	1.1632	0.439215	0.000872175
340	Day7	TBI	IC_avg	2.6155	4.928	6.258	3.718	1.125	1.16845	0.49289	0.00089492
344	Day7	TBI	IC_avg	2.9735	4.6805	6.8645	3.5555	1.178	1.16055	0.52517	0.00082977
346	Day7	TBI	IC_avg	2.1455	5.1545	6.6805	2.5885	1.2225	1.25865	0.552595	0.000906245
349	Day7	TBI	IC_avg	1.4105	2.9925	4.0355	0.7016	0.928	1.2029	0.468155	0.000892525
368	Day7	TBI	IC_avg	2.865	4.783	6.877	3.017	1.252	1.13165	0.45232	0.00093786
379	Day7	TBI	IC_avg	2.48	5.508	6.454	3.46	1.3145	1.07605	0.449525	0.000894775
340	Day14	TBI	IC_avg	3.1	4.64	5.97	3.38	1.17	1.39575	0.50263	0.000841595
344	Day14	TBI	IC_avg	2.94	4.825	6.4585	3.851	1.234	1.1537	0.51573	0.000846325
346	Day14	TBI	IC_avg	2.5625	4.593	6.7605	2.7905	1.1875	1.3156	0.544045	0.00087515
349	Day14	TBI	IC_avg	1.2995	2.587	4.645	1.855	0.954	1.18455	0.452785	0.00092541
368	Day14	TBI	IC_avg	3.0645	4.6855	6.6555	3.729	1.2985	1.23615	0.485445	0.000891275
379	Day14	TBI	IC_avg	3.1805	5.2385	6.7915	3.602	1.225	1.1426	0.452735	0.00088791
340	Day28	TBI	IC_avg	2.4205	4.529	6.7425	3.6565	1.3895	1.2972	0.545915	0.000917665
344	Day28	TBI	IC_avg	2.283	4.3155	6.666	3.254	1.274	1.1456	0.50352	0.00084804
346	Day28	TBI	IC_avg	2.635	4.665	6.723	2.647	1.303	1.35405	0.54371	0.00088771
349	Day28	TBI	IC_avg	1.7605	2.56	3.9345	2.3835	1.011	1.2046	0.48429	0.000907955
368	Day28	TBI	IC_avg	3.092	4.679	6.5025	3.389	1.3525	1.32585	0.48411	0.00086929
379	Day28	TBI	IC_avg	2.2325	4.251	6.195	2	1.194	1.248	0.452805	0.000902725
340	baseline	TBI	HP	2.603	6.863	7.346	5.966	1.066	0.69844	0.157615	0.000853185
344	baseline	TBI	HP	2.452	6.241	6.469	5.945	1.2	0.718045	0.13507	0.000877725
346	baseline	TBI	HP	2.287	6.023	6.358	4.957	1.014	0.673355	0.141235	0.00088081
349	baseline	TBI	HP	1.067	3.416	3.869	3.172	0.732	0.683135	0.12268	0.00085905
368	baseline	TBI	HP	2.977	6.131	6.554	5.437	1.113	0.688505	0.11751	0.00084687
379	baseline	TBI	HP	3.112	6.658	7.216	5.702	1.212	0.627855	0.13155	0.000897095
340	Day1	TBI	HP	3.01	6.529	6.339	5.629	1.009	0.73738	0.147855	0.000820145
344	Day1	TBI	HP	2.77	6.318	7.381	6.1	1.054	0.692425	0.136355	0.000863845
346	Day1	TBI	HP	2.232	6.236	6.979	4.896	0.973	0.699155	0.13082	0.000874505
349	Day1	TBI	HP	1.094	3.638	3.556	2.595	0.681	0.70461	0.13968	0.00090659
368	Day1	TBI	HP	3.246	5.952	6.257	5.075	1.138	0.750015	0.13359	0.000880265
379	Day1	TBI	HP	2.861	6.232	7.056	5.42	0.962	0.68724	0.128145	0.000852295
340	Day7	TBI	HP	2.621	5.44	6.631	4.734	0.998	0.735355	0.1709	0.00083991
344	Day7	TBI	HP	2.949	6.498	7.464	6.019	1.163	0.70322	0.147715	0.000870225
346	Day7	TBI	HP	2.132	5.811	6.55	4.779	1.019	0.689355	0.13801	0.00087303
349	Day7	TBI	HP	1.401	3.023	3.67	2.879	0.755	0.697445	0.127255	0.000857195
368	Day7	TBI	HP	2.602	6.042	7.177	5.486	1.052	0.90164	0.15597	0.000847175
379	Day7	TBI	HP	2.94	6.885	7.194	5.621	1.178	0.652115	0.124215	0.000855255
340	Day14	TBI	HP	2.747	5.779	6.392	5.562	0.958	0.83214	0.165795	0.000825935
344	Day14	TBI	HP	2.63	6.482	6.916	6.057	1.073	0.73151	0.140445	0.00084767
346	Day14	TBI	HP	2.442	5.987	7.12	5.66	1.17	0.736545	0.144235	0.000871845
349	Day14	TBI	HP	0.954	3.013	4.146	3.084	0.755	0.710595	0.130305	0.00087902
368	Day14	TBI	HP	2.653	5.437	7.577	4.867	1.081	0.90361	0.147535	0.00083448
379	Day14	TBI	HP	3.112	6.48	6.951	5.545	1.156	0.710945	0.127975	0.00085755
340	Day28	TBI	HP	3.03	6.059	7.144	5.871	1.157	0.737735	0.15187	0.000850205
344	Day28	TBI	HP	2.684	5.863	7.192	5.913	1.24	0.69376	0.14402	0.000865815
346	Day28	TBI	HP	2.475	5.885	7.048	5.647	1.137	0.74489	0.147475	0.000887945
349	Day28	TBI	HP	1.307	3.991	3.693	3.141	0.762	0.692165	0.123085	0.000886615
368	Day28	TBI	HP	3.212	6.526	6.804	5.819	1.122	0.784135	0.136375	0.00085285
379	Day28	TBI	HP	2.821	5.849	7.126	4.964	1.104	0.75092	0.13262	0.00084897
340	baseline	TBI	Cereb	2.431	7.137	6.608	4.022	0.997	1.0421	0.20399	0.00080526
344	baseline	TBI	Cereb	3.704	6.889	7.315	4.809	1.227	1.0171	0.17577	0.00084719
346	baseline	TBI	Cereb	2.655	7.069	6.733	4.651	1.043	0.97278	0.15226	0.00094229
349	baseline	TBI	Cereb	1.053	4.098	3.789	2.059	0.582	0.99403	0.17978	0.00077139
368	baseline	TBI	Cereb	2.953	7.05	6.734	3.806	1.069	0.93965	0.16493	0.00077436
379	baseline	TBI	Cereb	3.061	7.427	7.389	3.466	1.046	0.94613	0.16697	0.00086977
340	Day1	TBI	Cereb	3.367	6.93	6.695	3.954	0.986	1.0371	0.14769	0.00085822
344	Day1	TBI	Cereb	3.354	6.732	7.063	4.227	0.899	1.0066	0.16622	0.000864
346	Day1	TBI	Cereb	3.169	8.379	7.812	4.477	0.88	0.94917	0.16811	0.00090873
349	Day1	TBI	Cereb	1.206	5.349	4.681	2.001	0.865	0.81886	0.19046	0.00086889
368	Day1	TBI	Cereb	3.854	7.271	6.887	4.01	1.031	1.0922	0.17323	0.00081874
379	Day1	TBI	Cereb	4.348	7.691	7.786	3.983	0.873	0.98136	0.16543	0.00078149
340	Day7	TBI	Cereb	3.79	7.234	6.7	4.581	0.945	1.0205	0.17728	0.00080677
344	Day7	TBI	Cereb	3.824	7.341	7.496	4.688	1.063	1.0021	0.17065	0.00088226
346	Day7	TBI	Cereb	3.239	7.355	7.931	4.463	0.983	0.99258	0.15085	0.00093477
349	Day7	TBI	Cereb	1.163	4.689	4.36	2.191	0.691	0.99817	0.19018	0.00077694
368	Day7	TBI	Cereb	1.834	4.772	4.534	2.893	0.997	1.0625	0.17656	0.0007942
379	Day7	TBI	Cereb	2.741	7.195	7.166	3.519	1.115	0.98786	0.16758	0.00085274
340	Day14	TBI	Cereb	3.649	6.534	6.057	4.427	0.713	1.1293	0.16136	0.00080151
344	Day14	TBI	Cereb	3.442	6.935	7.209	4.201	0.979	1.0623	0.20085	0.00078441
346	Day14	TBI	Cereb	3.26	7.481	7.938	4.659	1.065	1.0436	0.17509	0.00090427
349	Day14	TBI	Cereb	1.518	4.484	4.553	2.628	0.737	1.0393	0.19311	0.00077447
368	Day14	TBI	Cereb	2.98	6.579	6.938	3.319	1.045	1.0026	0.18297	0.00078617
379	Day14	TBI	Cereb	2.555	7.559	7.267	4.17	1.186	1.0355	0.18521	0.00082452
340	Day28	TBI	Cereb	2.806	6.464	7.618	4.767	0.98	1.0649	0.18171	0.00089712
344	Day28	TBI	Cereb	3.546	6.07	7.385	3.94	1.092	1.0205	0.19441	0.00085382
346	Day28	TBI	Cereb	3.399	6.94	7.562	4.491	0.968	1.0591	0.18337	0.00091907
349	Day28	TBI	Cereb	1.139	4.338	3.709	1.93	0.783	1.0704	0.18134	0.00080441
368	Day28	TBI	Cereb	3.433	7.439	8.354	4.015	1.324	1.0762	0.17966	0.00081384
379	Day28	TBI	Cereb	3.151	7.909	7.353	4.163	1.138	1.0553	0.19615	0.00079229
C_02	baseline	Sham	IC_avg	2.7695	4.8425	6.6295	3.063	1.153	1.08215	0.43787	0.0009212
C_05	baseline	Sham	IC_avg	2.892	4.3655	6.3615	3.9455	1.1575	1.1686	0.466425	0.00090927
C_06	baseline	Sham	IC_avg	2.8395	4.65	6.485	3.025	1.135	1.06025	0.399195	0.00091627
C_04	baseline	Sham	IC_avg	2.733	5.264	7.017	3.3245	1.229	1.1024	0.462155	0.00091353
C_07	baseline	Sham	IC_avg	2.444	4.8835	7.196	2.529	1.2305	1.07915	0.45161	0.000867625
C_08	baseline	Sham	IC_avg	2.672	4.3085	6.6135	2.78	1.0735	1.06204	0.468275	0.000924185
C_02	Day1	Sham	IC_avg	2.995	5.176	7.1975	2.568	1.256	1.07245	0.43338	0.00090935
C_05	Day1	Sham	IC_avg	2.4165	4.8715	7.2015	2.214	1.209	1.09975	0.43412	0.000981165
C_06	Day1	Sham	IC_avg	2.3665	5.1835	7.066	3.031	1.3125	0.97164	0.41748	0.00086284
C_04	Day1	Sham	IC_avg	2.1905	4.7645	7.518	2.952	1.247	1.1056	0.475545	0.00089131
C_07	Day1	Sham	IC_avg	2.5975	4.7885	6.983	2.538	1.2325	1.1037	0.46278	0.000899105
C_08	Day1	Sham	IC_avg	3.382	5.199	6.676	4.923	1.2215	1.04692	0.43579	0.000912635
C_02	Day7	Sham	IC_avg	2.742	4.997	6.928	2.856	1.192	1.16675	0.442675	0.0009378
C_05	Day7	Sham	IC_avg	2.8865	4.992	7.299	3.38	1.368	1.0827	0.4467	0.00091763
C_06	Day7	Sham	IC_avg	2.7385	5.1195	6.6835	3.33	1.1665	1.0547	0.4219	0.000882085
C_04	Day7	Sham	IC_avg	2.4745	5.6265	6.3415	3.949	1.211	1.0825	0.475685	0.00085929
C_07	Day7	Sham	IC_avg	2.548	5.436	7.6405	3.0415	1.292	1.13575	0.455075	0.000915975
C_08	Day7	Sham	IC_avg	2.711	4.964	7.524	2.747	1.1255	0.9931	0.38236	0.00086288
C_02	Day14	Sham	IC_avg	2.6575	4.8815	7.0485	2.9115	1.1515	1.02275	0.40643	0.00093082
C_05	Day14	Sham	IC_avg	3.0895	4.772	7.4645	2.1995	1.3775	1.01582	0.40771	0.00085217
C_06	Day14	Sham	IC_avg	2.844	4.8075	7.2565	2.9675	1.2225	1.05875	0.446635	0.000891085
C_04	Day14	Sham	IC_avg	2.33	4.9815	7.228	2.596	1.2055	1.0805	0.45712	0.000902125
C_07	Day14	Sham	IC_avg	2.806	5.189	7.6455	2.9105	1.3325	1.0777	0.453835	0.00085817
C_08	Day14	Sham	IC_avg	2.8965	5.4065	7.332	3.121	1.1135	1.0631	0.43709	0.00088587
C_02	Day28	Sham	IC_avg	3.1335	4.9085	7.428	2.795	1.2915	1.1166	0.455745	0.00093325
C_05	Day28	Sham	IC_avg	2.5875	4.838	7.8325	2.5375	1.413	1.15795	0.49767	0.0008506
C_06	Day28	Sham	IC_avg	3.0545	4.524	6.6535	3.312	1.1635	1.133	0.48319	0.000897895
C_04	Day28	Sham	IC_avg	2.973	5.1155	6.917	3.075	1.144	1.22765	0.53658	0.00087011
C_07	Day28	Sham	IC_avg	3.009	4.898	7.261	2.9155	1.422	1.1458	0.49432	0.00089474
C_08	Day28	Sham	IC_avg	3.3215	5.152	7.216	4.065	1.2475	1.10295	0.465265	0.000895035
C_02	baseline	Sham	Cereb	3.438	6.037	5.757	3.07	0.765	0.67689	0.13961	0.000860885
C_04	baseline	Sham	Cereb	2.851	5.427	5.084	3.28	0.71	0.77114	0.132935	0.000842185
C_05	baseline	Sham	Cereb	3.273	7.648	6.22	3.93	1.039	0.722265	0.126895	0.000850975
C_06	baseline	Sham	Cereb	3.797	7.366	6.414	4.779	0.91	0.795835	0.138235	0.000864835
C_07	baseline	Sham	Cereb	2.898	8.411	6.404	4.476	1.097	0.750125	0.132445	0.00084765
C_08	baseline	Sham	Cereb	2.964	7.394	6.678	4.264	0.982	0.697165	0.136565	0.00087237
C_02	Day1	Sham	Cereb	2.96	7.792	6.717	4.329	1.173	0.7017	0.13617	0.000862645
C_04	Day1	Sham	Cereb	2.545	7.552	6.603	4.112	0.865	0.741005	0.12379	0.0008232
C_05	Day1	Sham	Cereb	2.646	7.177	6.13	4.104	0.993	0.67551	0.123725	0.00086688
C_06	Day1	Sham	Cereb	2.264	7.413	7.544	5.462	0.934	0.743745	0.13648	0.00085276
C_07	Day1	Sham	Cereb	3.938	8.279	6.694	4.802	1.049	0.709535	0.142315	0.00084998
C_08	Day1	Sham	Cereb	2.758	7.341	6.168	3.946	0.922	0.690435	0.135805	0.00085467
C_02	Day7	Sham	Cereb	3.423	7.165	6.004	3.884	0.927	0.68383	0.136025	0.000853655
C_04	Day7	Sham	Cereb	1.166	7.002	6.258	3.349	1.172	0.668255	0.121425	0.00086289
C_05	Day7	Sham	Cereb	3.248	7.247	7.721	4.301	1.036	0.69288	0.12711	0.00086621
C_06	Day7	Sham	Cereb	3.359	7.363	6.286	4.643	0.826	0.67775	0.12309	0.00085527
C_07	Day7	Sham	Cereb	3.208	7.493	7.07	4.472	1.018	0.701995	0.139575	0.00086845
C_08	Day7	Sham	Cereb	3.494	7.688	6.812	4.215	1.023	0.67435	0.12921	0.000851
C_02	Day14	Sham	Cereb	3.626	7.587	7.199	4.379	0.968	0.69568	0.13532	0.000882135
C_04	Day14	Sham	Cereb	3.482	7.725	6.329	4.1	0.906	0.671535	0.123065	0.00086417
C_05	Day14	Sham	Cereb	3.629	6.686	6.143	3.625	1.082	0.70335	0.119465	0.00088712
C_06	Day14	Sham	Cereb	3.432	7.587	6.73	4.627	0.91	0.67646	0.133275	0.00085326
C_07	Day14	Sham	Cereb	3.559	8.477	6.6	4.781	1.026	0.692965	0.140935	0.000863725
C_08	Day14	Sham	Cereb	3.744	7.611	6.367	4.178	0.832	0.677375	0.14314	0.000874345
C_02	Day28	Sham	Cereb	4.757	7.388	7.265	4.283	1.382	0.709435	0.14001	0.00086802
C_04	Day28	Sham	Cereb	2.812	7.355	5.481	3.502	0.786	0.700755	0.134345	0.00085643
C_05	Day28	Sham	Cereb	3.398	7.216	6.376	3.716	1.135	0.67702	0.125355	0.00088715
C_06	Day28	Sham	Cereb	3.114	8.104	6.623	4.512	0.936	0.6996	0.13709	0.00085174
C_07	Day28	Sham	Cereb	3.82	7.73	6.377	4.064	1.035	0.754295	0.141105	0.00086417
C_08	Day28	Sham	Cereb	4.073	8.13	7.589	4.348	1.03	0.69085	0.14868	0.000879815
C_02	baseline	Sham	HP	2.838	6.227	6.513	5.287	0.944	0.85148	0.15957	0.00077924
C_04	baseline	Sham	HP	2.514	5.989	7.314	4.848	1.08	0.90775	0.15679	0.00079923
C_05	baseline	Sham	HP	2.878	6.661	6.67	5.066	1.083	0.97042	0.15303	0.00076467
C_06	baseline	Sham	HP	2.698	5.957	6.944	4.959	1.163	0.98645	0.15841	0.00077368
C_07	baseline	Sham	HP	2.518	6.876	7.024	5.393	1.171	0.99584	0.14883	0.00076857
C_08	baseline	Sham	HP	2.757	6.657	7.163	5.487	1.13	0.94682	0.16316	0.00084702
C_02	Day1	Sham	HP	2.96	6.491	7.078	5.223	1.035	0.98308	0.16173	0.00079168
C_04	Day1	Sham	HP	2.6	6.259	7.245	5.431	1.042	0.96873	0.15522	0.0008146
C_05	Day1	Sham	HP	2.803	6.335	6.831	4.875	1.215	0.99173	0.15079	0.00077964
C_06	Day1	Sham	HP	2.007	5.849	6.815	4.936	1.067	0.99526	0.17817	0.00076045
C_07	Day1	Sham	HP	2.942	6.882	6.831	5.467	1.168	0.95549	0.14316	0.00078324
C_08	Day1	Sham	HP	2.734	7.387	7.498	5.09	1.207	0.93011	0.15395	0.0007928
C_02	Day7	Sham	HP	3.039	6.196	7.229	5.333	1.089	0.91095	0.16135	0.00084211
C_04	Day7	Sham	HP	2.818	6.621	8.076	5.358	1.137	0.96179	0.16467	0.00079535
C_05	Day7	Sham	HP	2.893	6.582	7.09	5.584	1.266	1.0445	0.15498	0.0007827
C_06	Day7	Sham	HP	2.814	6.756	7.45	5.597	1.127	1.0148	0.1531	0.00077312
C_07	Day7	Sham	HP	3.154	7.157	7.826	5.635	1.303	1.0171	0.16382	0.00079184
C_08	Day7	Sham	HP	2.74	6.348	7.315	5.701	1.218	0.95947	0.14979	0.00079909
C_02	Day14	Sham	HP	2.9	6.529	6.874	5.543	1.127	0.91312	0.18131	0.0007846
C_04	Day14	Sham	HP	2.728	7.095	7.841	5.766	1.168	1.0205	0.16368	0.00075392
C_05	Day14	Sham	HP	2.728	6.515	7.189	5.709	1.191	1.0196	0.16264	0.00077982
C_06	Day14	Sham	HP	2.743	6.281	7.444	5.418	1.158	0.95991	0.16117	0.00079354
C_07	Day14	Sham	HP	3.011	7.371	7.5	5.948	1.316	1.024	0.15642	0.00077669
C_08	Day14	Sham	HP	3.103	6.602	7.02	5.672	1.072	0.9578	0.15775	0.00078329
C_02	Day28	Sham	HP	2.844	6.108	7.624	5.474	1.139	0.93718	0.17673	0.0007833
C_04	Day28	Sham	HP	3.107	6.669	7.137	5.492	1.048	1.0085	0.16962	0.00080469
C_05	Day28	Sham	HP	3.065	6.679	6.877	5.258	1.313	1.0452	0.1597	0.00079766
C_06	Day28	Sham	HP	2.674	6.201	7.017	5.313	1.017	0.98736	0.16598	0.00079347
C_07	Day28	Sham	HP	3.038	6.863	6.96	5.323	1.355	1.0406	0.15805	0.00077662
C_08	Day28	Sham	HP	2.945	6.458	6.962	5.19	1.159	1.0479	0.17695	0.00078925
